# Supplementary material for: Low-cost multilevel microchannel lab on chip: DF-1000 series dry film photoresist as a promising enabler
Source: Royal Society of Chemistry journal article supplement (doi:10.1039/c4ra09097g), 2014-10-21
Supplement: c4ra09097g1.pdf [file c4ra09097g1.pdf]

### Electronic Supplementary Information:

Manuscript “Low-cost multilevel microchannel lab on chip: DF-1000 series dry film photoresist as a promising enabler”

By R. Courson<sup>a,b</sup>, S. Cargou<sup>a,b</sup>, V. Conedera<sup>a,b</sup>, M. Fouet<sup>a,b</sup>, M. C. Blatche<sup>a,b</sup>, C. L. Serpentine<sup>c</sup>, A. M. Gue<sup>a,b</sup>

<sup>a</sup> LAAS-CNRS, University of Toulouse, 7 Avenue du Colonel Roche, BP 54200, 31 031 Toulouse cedex 4, France.

<sup>b</sup> Univ de Toulouse, LAAS, F-31400 Toulouse, France.

<sup>c</sup> CNRS, UMR5623 – IMRCP, Bât. de Chimie 2R1, Université Paul Sabatier, 118 Route de Narbonne, 31062 Toulouse cedex 9, France.

**Table 2:** Optical properties (excitation and emission wavelength) of some fluorophores and fluorescent particles commonly used in microfluidics.

|                                            |                                                                     | <i>Absorption<br/>(nm)</i> | <i>Emission<br/>(nm)</i> |
|--------------------------------------------|---------------------------------------------------------------------|----------------------------|--------------------------|
| <b>Dye</b>                                 | FITC                                                                | 494                        | 521                      |
|                                            | Rhodamin B                                                          | 542                        | 627                      |
|                                            | Cy5                                                                 | 650                        | 792                      |
|                                            | YOYO-1                                                              | 491                        | 509                      |
|                                            | Hoeschst                                                            | 343                        | 483                      |
|                                            | TurboGFP                                                            | 482                        | 502                      |
| <b>Magnetic-<br/>Fluorescent<br/>Beads</b> | screenMAG-Amine<br>(Chemicell, 1 µm<br>diameter)                    | 502                        | 525                      |
|                                            | Carboxyl Magnetic<br>Particles (Spherotech, 2<br>and 5 µm diameter) | 488                        | 530                      |

### Biocompatibility

Because microfluidic devices are used in a lot of biological applications we also tested the cytotoxicity of one sample of the DF-1050 (laminated onto a silicon substrate, insulated and hard-baked) according to the protocol of ISO 10993-5. L-929 mouse fibroblast cells were used. Polyurethane film containing 0.1% zinc diethyldithiocarbamate and high density polyethylene sheet were used as positive and negative control respectively. Materials were incubated for 24 h at 37°C in EMEM10 (Single strength Minimum Essential Medium Eagle) respecting a ratio of the surface area to the cell culture medium of 3 cm<sup>2</sup>/ml. 100 µl of the test material extract was used to cultivate L-929 cells. For this purpose, wells of a 96-well plate were seeded with approximately 104 cells per well and incubated during 24 h under standard conditions to obtain semi-confluent monolayers of cells prior to use. MTS cytotoxicity test was performed to quantify the viability cells rate after 24 h of incubation within the extract. The statistical results have shown a viability rate of 3.9% for the positive control articles whereas for the negative control and the DF-1050 the viability rate was 97.1% and 93 % respectively.

This study proves that DF-1050 is suitable for biological applications.
